# Supplementary material for: Dissecting the molecular evolution of fluoroquinolone-resistant Shigella sonnei
Source: PubMed Central journal article supplement (PMC6811581; doi:10.1038/s41467-019-12823-0), 2019-10-23
Supplement: 41467_2019_12823_MOESM1_ESM.pdf [file 41467_2019_12823_MOESM1_ESM.pdf]

**Supplementary Information: Chung The H. *et al.* Dissecting the molecular evolution of fluoroquinolone-resistant *Shigella sonnei*.**

**Supplementary Figure 1.** Population structure and colicin plasmid mapping for 395 CenAsiaIII *Shigella sonnei*. The maximum likelihood phylogeny is identical to that described in Figure 1. The branch colour scheme indicates bootstrap support for the corresponding branch, ranging from low to high (red to black). The rings present the associated data for each taxon, detailed from the innermost to the outermost as follows: (1) population clusters based on Bayesian Analysis of Population Structure (BAPS) hierarchical clustering (Pop1 and Pop2); (2) country (for South and Southeast Asia) or region of original source; (3) presence of colicin plasmid pSSE3; (4) presence of different plasmid Inc types; (5) presence of colicin families. The horizontal scale bar denotes the number of substitutions per site.

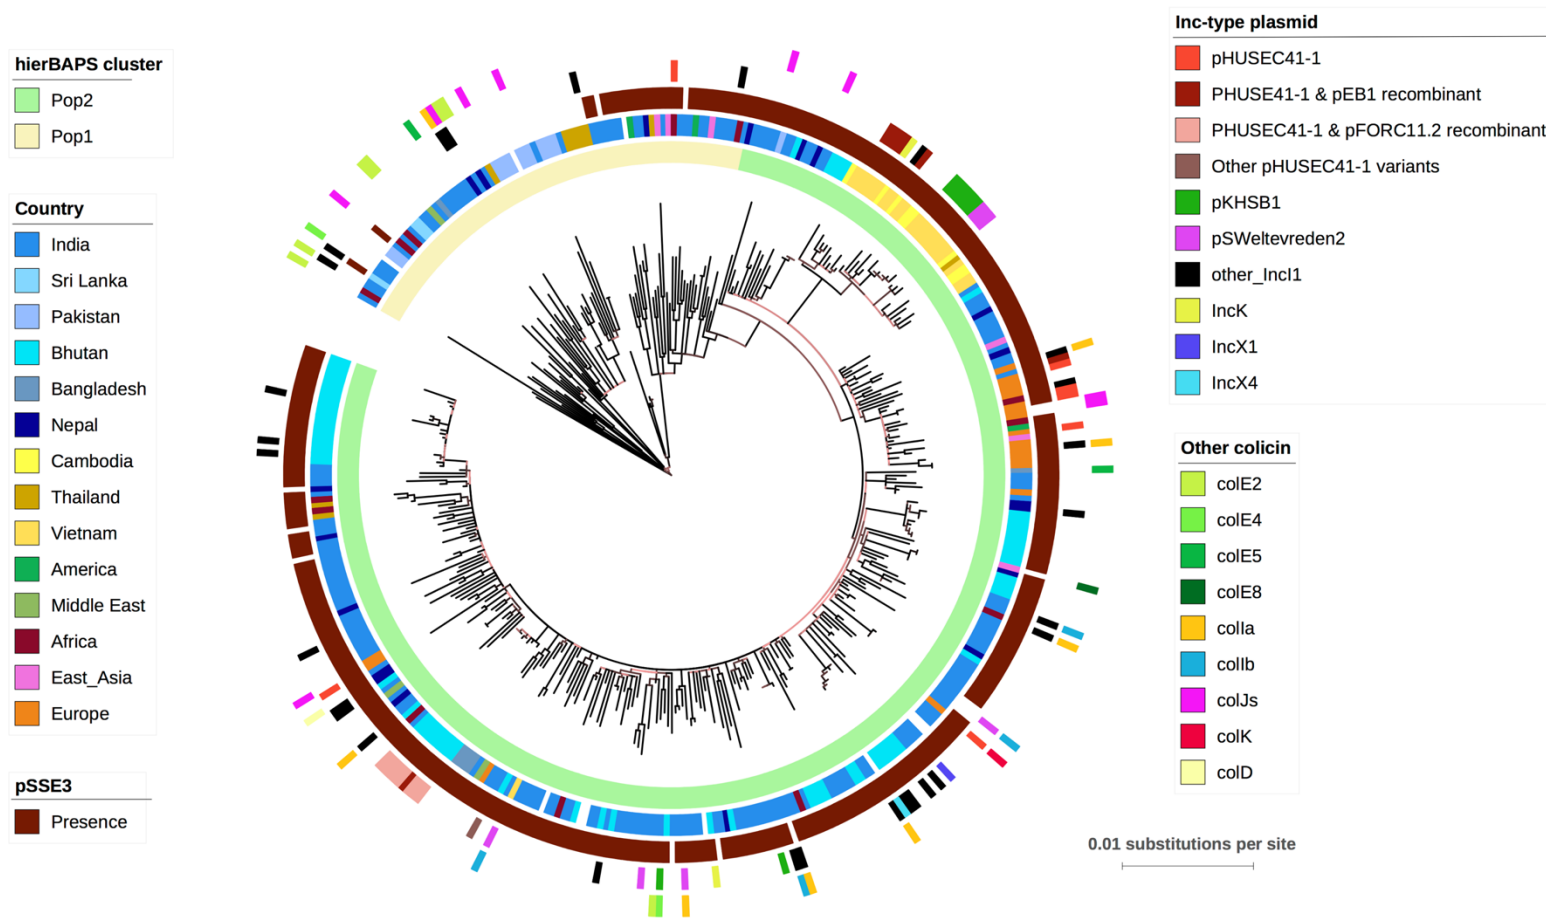

**Supplementary Figure 2.** Bayesian skyline plot showing the change in effective population size of fluoroquinolone-resistant (FQr) *Shigella sonnei*. The analysis was performed on 134 isolates of FQr *S. sonnei* (all containing *gyrA*-S83L, *parC*-S80I, and *gyrA*-D87G mutations), using the TVM substitution model coupled with a strict molecular clock and Bayesian skyline demographic model.

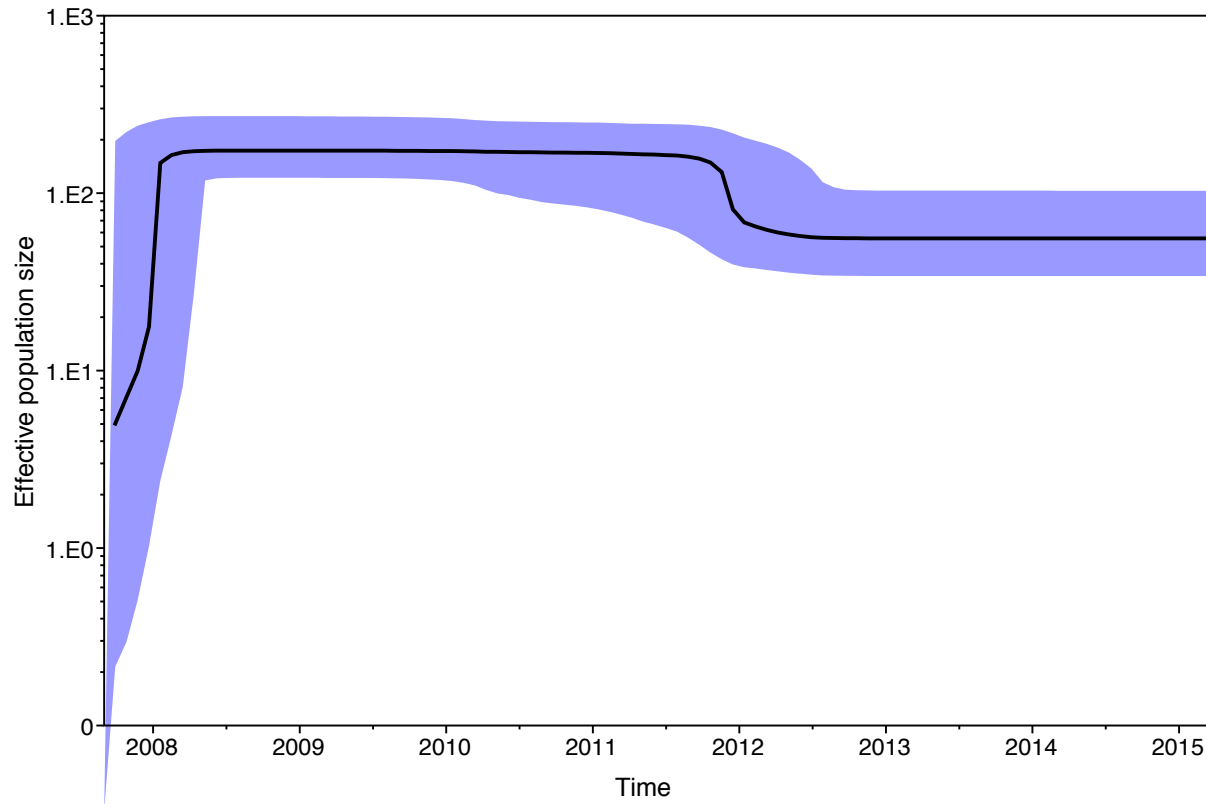

**Supplementary Figure 3.** Validation of phylogeographical signal in CenAsiaIII *Shigella sonnei*. Stochastic mapping was performed on the original dataset (Figure 3) and ten tip-location randomized datasets (see Materials and Methods). The individual panels compare the inferences made from the original ‘true’ dataset and ten randomizations, measuring the number of transition events from South Asia to Africa, to East Asia/Southeast Asia, and to Europe, as well as the proportional time spent in South Asia during CenAsiaIII’s evolutionary history. The boxplots summarize results of 966 and 500 successful subsamplings of the phylogenies for the original dataset and each randomization, respectively. The asterisks above the median bar within the boxplot of each randomization denote a significant difference between the estimates from the true phylogeny (coloured red) and those derived from the respective randomization (ANOVA Tukey’s test;  $p < 0.05$ ).

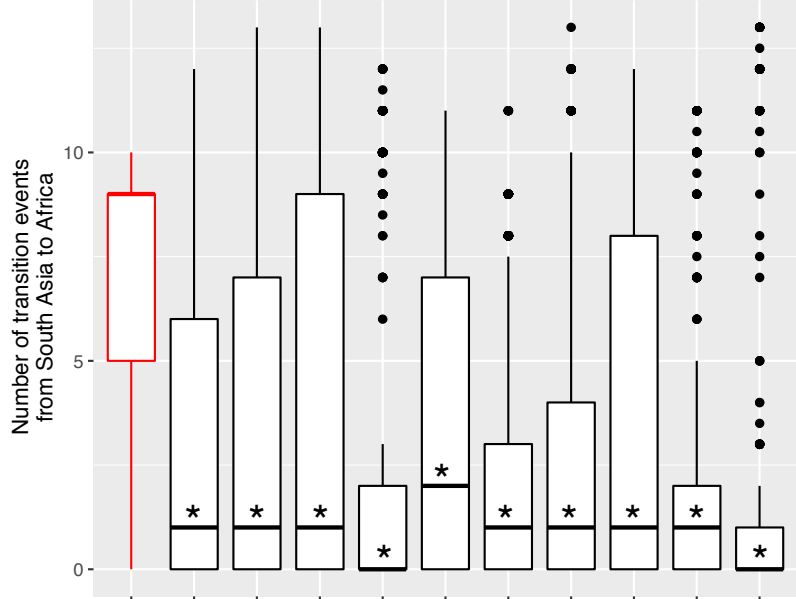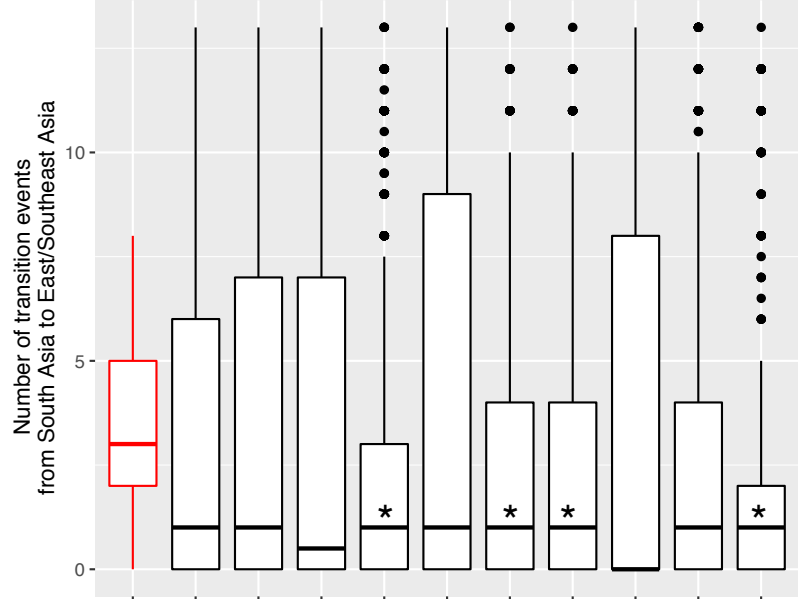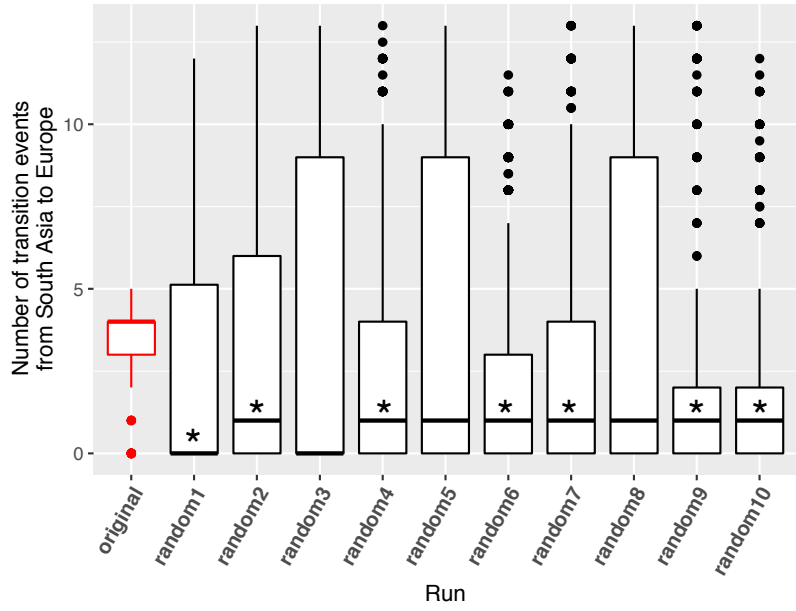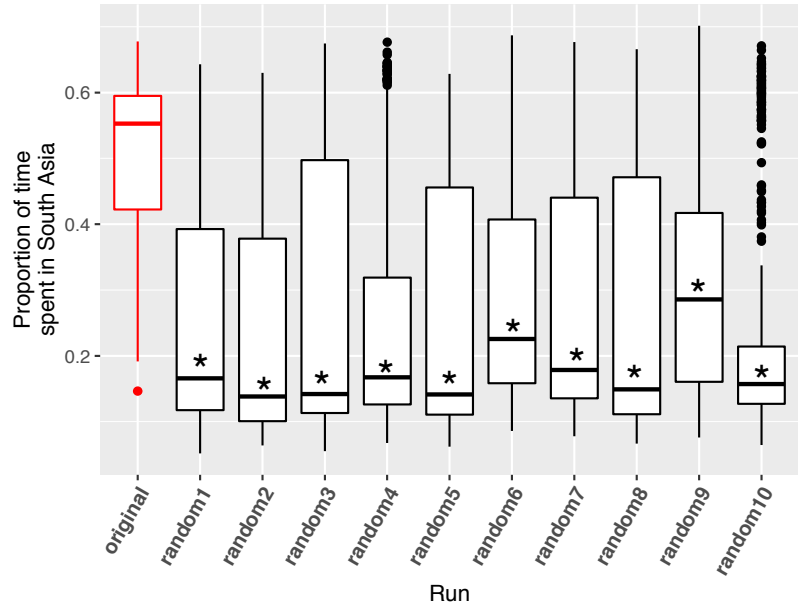

**Supplementary Table 1.** List of lineage-defining pseudogenes and gene loss in 395 CenAsiaIII *Shigella sonnei*.

| <b>Pseudogene/<br/>gene loss</b> | <b>Mode of inactivation</b>         | <b>GO-function</b>                                        | <b>Number of<br/>isolates</b> | <b>Estimated time of mutation</b>                             |
|----------------------------------|-------------------------------------|-----------------------------------------------------------|-------------------------------|---------------------------------------------------------------|
| <i>ydhV</i>                      | Disruption by IS600                 | Putative oxidation-reduction process                      | 395                           | Since MRCA of CenAsiaIII                                      |
| <i>asmA</i>                      | stop codon (loss of 4aa at the end) | regulation of protein targeting to membrane               | 395                           | Since MRCA of CenAsiaIII                                      |
| <i>hofC</i>                      | stop codon                          | pilus organization                                        | 395                           | Since MRCA of CenAsiaIII                                      |
| <i>ybhM</i>                      | stop codon                          | Inner membrane                                            | 395                           | Since MRCA of CenAsiaIII                                      |
| <i>yohL</i>                      | stop codon                          | transcription regulation of cobalt and nickel homeostasis | 395                           | Since MRCA of CenAsiaIII                                      |
| <i>ybeB</i>                      |                                     | regulation of translation                                 | 395                           | Since MRCA of CenAsiaIII                                      |
| <i>araH</i>                      | Disruption by IS600                 | arabinose transport                                       | 395                           | Since MRCA of CenAsiaIII                                      |
| <i>ydeK</i>                      | Disruption by IS4                   | membrane autotransporter                                  | 395                           | Since MRCA of CenAsiaIII                                      |
| <i>pepE</i>                      | frameshift                          | proteolysis                                               | 395                           | Since MRCA of CenAsiaIII                                      |
| <i>ybeQ</i>                      | frameshift                          | oxidative stress response                                 | 395                           | Since MRCA of CenAsiaIII                                      |
| <i>ybeV</i>                      | Inframe insertion (+1aa)            | Regulation of ATPase activity                             | 395                           | Since MRCA of CenAsiaIII                                      |
| <i>yjcR</i>                      | Disruption by IS1S                  | sulfur drug transmembrane transport                       | 395                           | Since MRCA of CenAsiaIII                                      |
| <i>fliC</i>                      | Disruption by IS element            | Cell motility (flagellin monomer)                         | 395                           | Since MRCA of CenAsiaIII                                      |
| <i>nfsA</i>                      | Disruption by IS1                   | oxidation-reduction                                       | 395                           | Since MRCA of CenAsiaIII                                      |
| <i>phoE</i>                      | Disruption by IS2                   | transport                                                 | 341                           | Since 1996 with <i>gyrA</i> S83L                              |
| <i>yeaK</i>                      | Disruption by IS element            | positive regulation of translational fidelity             | 341                           | Since 1996 with <i>gyrA</i> S83L                              |
| <i>uxaC</i>                      | stop codon                          | glucuronate metabolism                                    | 341                           | Since 1996 with <i>gyrA</i> S83L                              |
| <i>ybdR</i>                      | stop codon                          | oxidation-reduction                                       | 341                           | Since 1996 with <i>gyrA</i> S83L                              |
| <i>citF</i>                      | frameshift                          | citrate metabolism                                        | 341                           | Since 1996 with <i>gyrA</i> S83L                              |
| <i>yqiH</i>                      | frameshift                          | pilus organization                                        | 341                           | Since 1996 with <i>gyrA</i> S83L                              |
| <i>fliCAZY</i>                   | Genomic deletion                    | Flagellum (cell motility)                                 | 334                           | Before <i>parC</i> S80I in 2005 + independent sporadic losses |
| <i>yddA</i>                      | Disruption by IS element            | transport                                                 | 309                           | Before <i>parC</i> S80I in 2005                               |
| <i>yaiU</i>                      | inframe deletion (2aa)              | transport                                                 | 309                           | Before <i>parC</i> S80I in 2005                               |
| <i>flhC</i>                      | stop codon                          | regulation of flagellum assembly                          | 20                            | Bhutanese subclade                                            |
| <i>ybeM</i>                      | stop codon                          | nitrogen compound metabolism                              | 20                            | Southeast Asian expansion                                     |
| <i>ecpD</i>                      | stop codon                          | pilus organization                                        | 20                            | Southeast Asian expansion                                     |
| <i>ycbO</i>                      | stop codon                          | transport                                                 | 31                            | BAPS pop1, since <i>gyrA</i> D87Y mutation                    |

**Supplementary Table 2.** Distribution of pseudogenization events per gene in 393 CenAsiaIII *Shigella sonnei*.

| Distribution of pseudogenes caused by substitutions and small indels in 393 CenAsiaIII <i>S. sonnei</i> |     |    |                                   |                                           |                                     |                                                          |             |             |             |
|---------------------------------------------------------------------------------------------------------|-----|----|-----------------------------------|-------------------------------------------|-------------------------------------|----------------------------------------------------------|-------------|-------------|-------------|
| total number of inactivation mutations                                                                  | 1   | 2  | 3                                 | 4                                         | 5                                   | 7                                                        | 8           | 14          | 46          |
| no. of genes                                                                                            | 339 | 34 | 6                                 | 2                                         | 1                                   | 2                                                        | 1           | 1           | 1           |
| gene names                                                                                              |     |    | <i>hemX</i>                       | SSON_0870<br>(hypothetical protein)       | SSON_0348<br>(hypothetical protein) | SSON_0242<br>(putative Clp proteinase ATP-binding chain) | <i>ynfK</i> | <i>pepT</i> | <i>rpoS</i> |
|                                                                                                         |     |    | <i>mglA</i>                       | SSON_2732<br>(phage late control protein) |                                     | <i>puuD</i>                                              |             |             |             |
|                                                                                                         |     |    | SSON_0868<br>(putative integrase) |                                           |                                     |                                                          |             |             |             |
|                                                                                                         |     |    | <i>yaiU</i>                       |                                           |                                     |                                                          |             |             |             |
|                                                                                                         |     |    | <i>yfeG</i>                       |                                           |                                     |                                                          |             |             |             |
|                                                                                                         |     |    | <i>yggJ</i>                       |                                           |                                     |                                                          |             |             |             |

**Supplementary Table 3.** Distribution of synonymous and nonsynonymous mutations in 3,637 genes in the CenAsiaIII *Shigella sonnei* population.

| <b>Distribution of mutations in 3637 genes outside the recombination region (as defined in the 'phylogenetic reconstruction' in Methods)</b> |      |     |     |    |    |   |   |             |                   |             |             |
|----------------------------------------------------------------------------------------------------------------------------------------------|------|-----|-----|----|----|---|---|-------------|-------------------|-------------|-------------|
| no. of nonsynonymous SNPs                                                                                                                    | 0    | 1   | 2   | 3  | 4  | 5 | 6 | 7           | 8                 | 10          | 23          |
| no. of genes                                                                                                                                 | 2324 | 910 | 284 | 86 | 20 | 6 | 2 | 1           | 2                 | 1           | 1           |
| gene names                                                                                                                                   |      |     |     |    |    |   |   | <i>sigA</i> | <i>gyrA, putA</i> | <i>mreB</i> | <i>rpoS</i> |
| no. of synonymous SNPs                                                                                                                       | 0    | 1   | 2   | 3  | 4  | 5 | 6 | 7           |                   |             |             |
| no. of genes                                                                                                                                 | 2763 | 683 | 166 | 22 | 1  | 1 | 0 | 1           |                   |             |             |
