# Supplementary material for: Dissecting the molecular evolution of fluoroquinolone-resistant Shigella sonnei
Source: PubMed Central journal article supplement (PMC6811581; doi:10.1038/s41467-019-12823-0), 2019-10-23
Supplement: 41467_2019_12823_MOESM3_ESM.pdf [file 41467_2019_12823_MOESM3_ESM.pdf]

## **Description of Additional Supplementary Files**

File Name: Supplementary Data 1

Description: Associated metadata for all *Shigella sonnei* sequences used in this study.

File Name: Supplementary Data 2

Description: Occurrence of major plasmids found in 395 CenAsiaIII *S. sonnei* (excluding the *S. sonnei* large virulence plasmid).
